# Supplementary material for: Puerarin induces mouse mesenteric vasodilation and ameliorates hypertension involving endothelial TRPV4 channels
Source: Royal Society of Chemistry journal article supplement (doi:10.1039/d0fo02356f), 2020-01-01
Supplement: d0fo02356f1.pdf [file d0fo02356f1.pdf]

## **Supplementary Information**

**Puerarin induces mouse mesenteric vasodilation and ameliorates hypertension involving endothelial TRPV4 channels**

### **Authors**

Tingting Zhou, Zhiwei Wang, Mengting Guo, Ka Zhang, Li Geng, Aiqin Mao, Yujiao Yang, and Fan Yu

### **This Supplementary Information Includes:**

**Supplementary materials and methods**

**Supplementary Figures**

**Supplementary Figure Legends**

## **Supplementary materials and methods**

### **Immunocytochemistry assay**

The cultured cells were rinsed with 3 times in PBS and fixed with 4% paraformaldehyde for 30 min, then blocked in 5% fetal bovine serum with 0.2% Triton X-100 in PBS for 60 min at room temperature. Samples were incubated with primary antibodies overnight at 4 °C, rinsed with 3 times in PBS for 5 min, and then incubated with secondary fluorescently-labeled antibody for 1 h at room temperature. Nuclei were counterstained with DAPI. Images were captured on a Leica TCS SP8 confocal microscope.

## Supplementary Figures

### Supplementary Figure 1

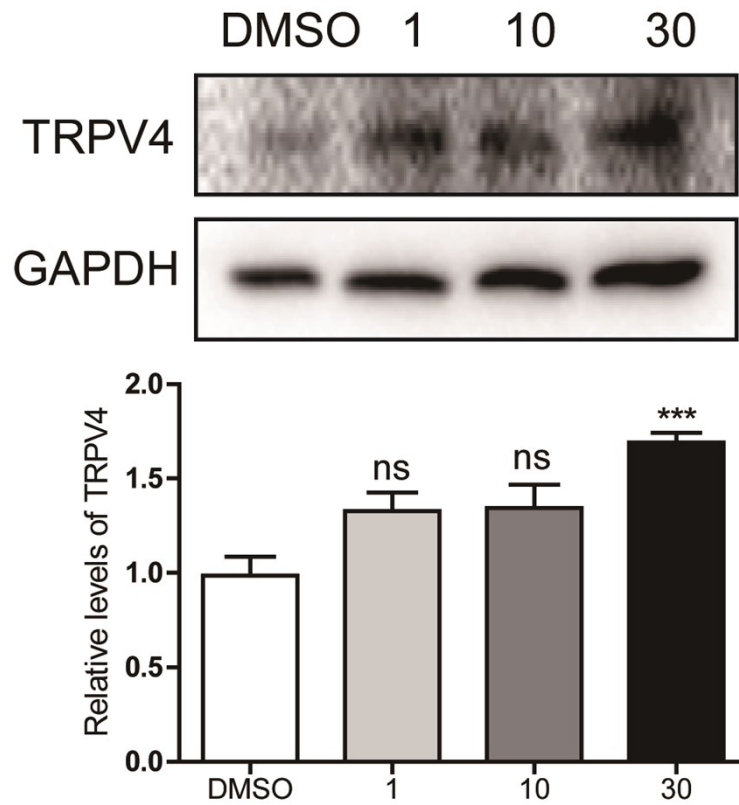

Supplementary Figure 1. The effect of Pue on TRPV4 expression in MAECs. MAECs were cultured with Pue (1, 10, 30  $\mu$ M) for 12 h, then conducted the western blot assay. ns vs.

DMSO, \*\*\* $P < 0.001$  vs. DMSO, One-way ANOVA,  $n=3$ .

**Supplementary Figure 2**

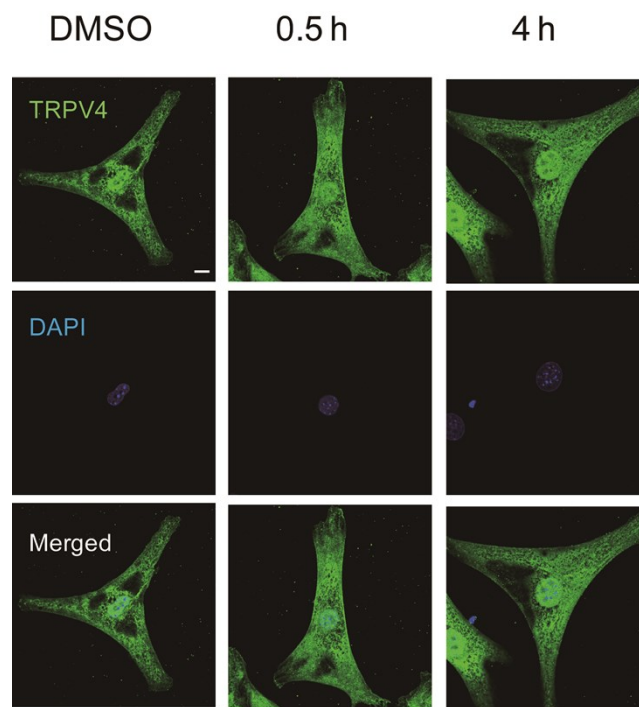

Supplementary Figure 2. The effect of Pue on TRPV4-cellular distribution in MAECs. Cells were treated with Pue (30  $\mu$ M) for 0.5 or 4 h, then conducted the immunocytochemistry assay.

Scale bar: 10  $\mu$ m.

### Supplementary Figure 3

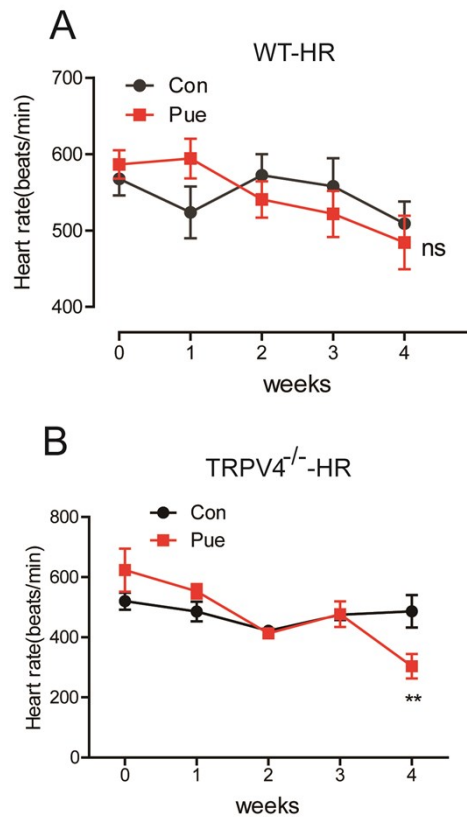

Supplementary Figure 3. The effect of Pue on heart rate (HR) in high-salt-induced hypertensive mice. (A-B) HR was detected weekly in Pue-treated high-salt-induced hypertensive wild-type (A) and TRPV4<sup>-/-</sup> (B) mice. ns vs. Con, \*\* $P < 0.01$  vs. Con, Two-way ANOVA,  $n=6$ .

## **Supplementary Figure Legends**

### **Supplementary Figure 1. The effect of Pue on TRPV4 expression in MAECs**

MAECs were cultured with Pue (1, 10, 30  $\mu$ M) for 12 h, then conducted the western blot assay. ns vs. DMSO, \*\*\* $P < 0.001$  vs. DMSO, One-way ANOVA,  $n=3$ .

### **Supplementary Figure 2. The effect of Pue on TRPV4-cellular distribution in MAECs**

Cells were treated with Pue (30  $\mu$ M) for 0.5 or 4 h, then conducted the immunocytochemistry assay. Scale bar: 10  $\mu$ m.

### **Supplementary Figure 3. The effect of Pue on heart rate (HR) in high-salt-induced hypertensive mice**

(A-B) HR was detected weekly in Pue-treated high-salt-induced hypertensive wild-type (A) and TRPV4<sup>-/-</sup> (B) mice. ns vs. Con, \*\* $P < 0.01$  vs. Con, Two-way ANOVA,  $n=6$ .
